# Supplementary material
Source: ML conference proceedings conference paper supplement (https://aclanthology.org/2020.nlpcss-1.1)
Supplement: OptionalSupplementaryMaterial [file 1.region_data_by_month.xlsx]

## Sheet: monthly
	africa_southern	oceania	asia_east	europe_russia	america_central	america_north	asia_central	asia_south	america_brazil	africa_sub	america_south	europe_west	africa_north	middle_east	asia_southeast	europe_east
2018-07	274702	521578	279092	241169	1367776	531642	371688	671696	244010	934938	1661723	3388228	368935	782728	753373	1185674
2018-08	228623	439049	231085	205000	1162925	437600	292712	553721	209424	757357	1385090	2774178	295073	646478	631064	967908
2018-09	316533	1456591	331351	278147	1617256	646859	403498	783389	293832	1093833	1938685	4090612	417808	896715	888770	1338781
2018-10	529989	2194983	524638	435388	2605201	1042339	624624	1203462	464563	1718105	3157280	6462231	654493	1433137	1424362	2111261
2018-11	497869	908304	519700	400282	2451851	984737	586628	1152056	434783	1603780	2992047	6108800	608098	1346641	1341471	1995741
2018-12	556606	1008189	744566	441640	2761753	1088001	691606	1324625	475218	1852140	3363662	6723361	727918	1553345	1512481	2365952
2019-01	582942	1030736	753213	435361	2910048	1133989	697227	1370818	494231	1901766	3459790	7041706	727715	1602662	1528309	2472883
2019-02	522693	943189	672970	373741	2674611	1025824	602471	1246912	451886	1716407	3149775	6357647	636331	1469244	1343177	2131853
2019-03	524754	946502	678170	374469	2651793	1057616	584523	1266273	437326	1778476	3150853	6436029	665671	1474696	1326262	2140939
2019-04	454186	840345	581115	330314	2277836	941064	548084	1087664	382037	1559231	2799342	5757616	604860	1305813	1122278	1934433
2019-05	444754	823681	551979	343672	2248284	914452	529026	1060062	375981	1559710	2787180	5750418	576324	1317964	1112996	1881316
2019-06	347267	609164	430575	266273	1756664	684353	413128	809989	290242	1213622	2142554	4389165	457652	1043916	839658	1427130
2019-07	522027	920885	660567	395396	2666455	1012555	608888	1224033	452573	1823123	3188577	6402839	689188	1532090	1276192	2059568
2019-08	545540	996148	722909	409897	2947258	1070521	637349	1330686	480728	1944551	3414077	6780840	725795	1642556	1404000	2205866
2019-09	505124	917365	682375	374514	2765213	1014125	598627	1257863	452877	1861315	3200729	6463463	683114	1541270	1294895	2042489
2019-10	528773	988382	734442	403660	3004420	1080661	651326	1331105	484209	1964339	3504405	6862242	735061	1632307	1388045	2207655
2019-11	537283	997627	749074	407005	2987200	1079269	612520	1350549	490003	2004269	3534595	7043634	734297	1667422	1412964	2245592
2019-12	528092	990678	740577	393622	2901231	1054589	631044	1318181	478633	1960024	3393912	6698940	753795	1630117	1377366	2177734
2020-01	497783	943907	692635	363184	2778886	998758	622219	1214740	447992	1850350	3192950	6402541	693947	1531590	1269512	2093645
2020-02	469861	892392	665452	353634	2664343	976942	609503	1125282	434492	1778752	3082499	6167847	646284	1443758	1209134	2000586
2020-03	569504	1099907	799642	411259	3365087	1156622	752886	1429295	516574	2164536	3830358	7511239	840770	1788311	1460839	2615296
2020-04	517921	1013603	709321	392097	3136996	1053309	674351	1336065	483585	2001319	3546859	6812467	764114	1648495	1360969	2304195
2020-05	514793	993826	701887	386485	3064710	1045825	666928	1350125	485582	1977504	3439062	6705795	763747	1643184	1345178	2189223
2020-06	484006	943106	674983	380029	2865738	995447	658061	1287516	468178	1891347	3278142	6451478	730097	1565146	1274101	2116272
2020-07	513620	985195	700439	384146	2943661	1060774	671295	1304373	484732	1938840	3411175	6679803	727210	1609368	1296858	2159320
2020-08	270287	515686	355546	200445	1546808	554894	342633	676741	253184	1028287	1789625	3478071	376350	838984	688023	1113766
TOTAL	12285532	24921018	15888303	9380829	66124004	24642767	15082845	30067221	10966875	43877921	77794946	155741190	16604647	36587937	31882277	51485078
	0.0197094	0.0399802	0.0254893	0.0150495	0.106081	0.0395338	0.0241971	0.0482362	0.0175939	0.0703924	0.124805	0.249852	0.0266385	0.0586972	0.051148	0.0825964
	623333390
